# Supplementary material
Source: HighWire-hosted journal article supplement (http://www.cmaj.ca/highwire/filestream/57619/field_highwire_adjunct_files/0/risk-tran-appendix_1.pdf)
Supplement: risk-tran-appendix_1.pdf [file risk-tran-appendix_1.pdf]

**Appendix 1** (as supplied by the authors): Clinical details of children with neurological manifestations thought to be unrelated to their influenza infection.

| <b>Age group</b> | <b>Underlying condition(s)</b>                                                              | <b>Presentation</b>                                                                       | <b>Significant findings</b>                                                             | <b>Presumed etiology of neurological manifestations</b>                    |
|------------------|---------------------------------------------------------------------------------------------|-------------------------------------------------------------------------------------------|-----------------------------------------------------------------------------------------|----------------------------------------------------------------------------|
| 2-5 years        | Progressive neurodegenerative disease                                                       | Severe respiratory distress<br>Increased seizure frequency<br>New onset gelastic seizures | Epileptiform EEG                                                                        | Progression of underlying disease                                          |
| 2-5 years        | Global developmental delay<br>Seizure disorder<br>Previous admissions in status epilepticus | Status epilepticus                                                                        | Normal CSF and unchanged cranial MRI                                                    | Status epilepticus due to underlying disease, triggered by febrile illness |
| <1 year          | None                                                                                        | Seizures<br>Apnea following anticonvulsants<br>Mild nasal congestion and low grade fever  | Serum Na <sup>+</sup> 118 mmol/L<br>Normal endocrine and renal work-up for hyponatremia | Hyponatremia due to consumption of excessively dilute formula feed.        |
